# Supplementary material for: PD-1/PD-L1 Checkpoint Inhibitors Are Active in the Chicken Embryo Model and Show Antitumor Efficacy In Ovo
Source: MDPI journal article supplement (doi:10.3390/cancers14133095), 2022-06-23
Supplement: s1 [file s1]

# PD-1/PD-L1 Checkpoint Inhibitors Are Active in the Chicken Embryo Model and Show Antitumor Efficacy *In Ovo*

Yan Wang <sup>1,\*</sup>, Xavier Rousset <sup>1</sup>, Chloé Prunier <sup>1</sup>, Paul Garcia <sup>1,2,3</sup>, Emilien Dosda <sup>1</sup>, Estelle Leplus <sup>4</sup> and Jean Viallet <sup>1,2</sup>

## PD-L1

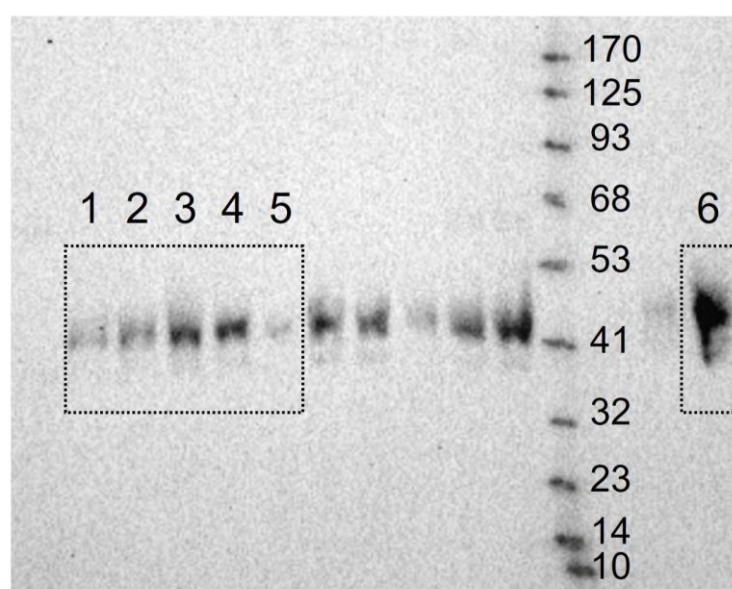

## GAPDH

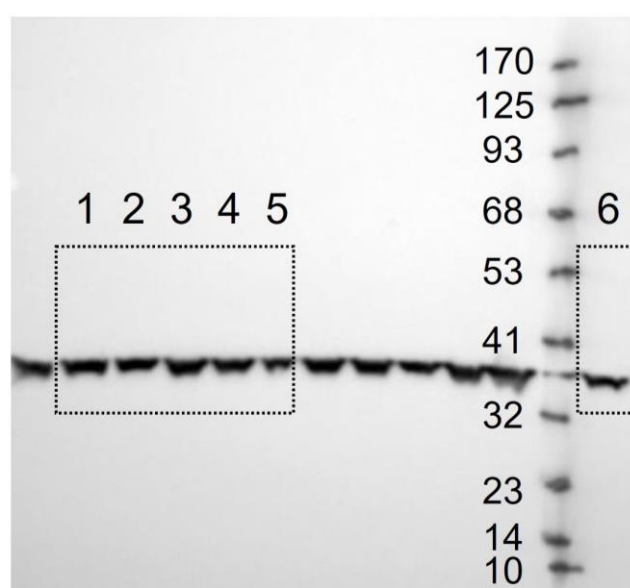

**Figure S1.** Western Blot Analysis of PD-L1 Expression on *in ovo* Xenografted H460 Tumors.
